# Supplementary material for: Conferring High IAA Productivity on Low-IAA-Producing Organisms with PonAAS2, an Aromatic Aldehyde Synthase of a Galling Sawfly, and Identification of Its Inhibitor
Source: MDPI journal article supplement (doi:10.3390/insects14070598), 2023-07-02
Supplement: s1 [file s1]

Table S2. Information of PonAAS2 inhibitors found by the initial screening.

|          | molecular formula                                | molecular weight | concentration ( $\mu\text{M}$ ) <sup>1</sup> |                                                                                      |
|----------|--------------------------------------------------|------------------|----------------------------------------------|--------------------------------------------------------------------------------------|
| HTS09643 | $\text{C}_{15}\text{H}_{11}\text{NO}_6\text{S}$  | 333.3            | 120.0                                        | 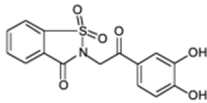   |
| HTS09784 | $\text{C}_{13}\text{H}_{20}\text{N}_6\text{O}$   | 276.3            | 144.7                                        |    |
| HTS10037 | $\text{C}_{14}\text{H}_{17}\text{NO}_3$          | 247.3            | 161.7                                        |    |
| HTS10442 | $\text{C}_{12}\text{H}_9\text{NO}_4$             | 231.2            | 173.0                                        |    |
| HTS10550 | $\text{C}_{16}\text{H}_{13}\text{N}_3\text{O}_2$ | 279.3            | 143.2                                        |    |
| HTS11483 | $\text{C}_{11}\text{H}_{10}\text{ClN}_3$         | 219.7            | 182.1                                        |  |
| HTS12813 | $\text{C}_{12}\text{H}_9\text{N}_3\text{OS}$     | 243.3            | 164.4                                        |  |
| HTS12892 | $\text{C}_{11}\text{H}_9\text{NO}_2\text{S}$     | 219.3            | 182.4                                        |  |
| JA00082  | $\text{C}_6\text{H}_6\text{N}_4\text{O}_2$       | 166.1            | 240.8                                        |  |
| JFD03671 | $\text{C}_{16}\text{H}_{11}\text{N}_3\text{O}$   | 261.3            | 153.1                                        |  |
| JFD03939 | $\text{C}_9\text{H}_6\text{INO}_4\text{S}$       | 351.1            | 113.9                                        |  |

<sup>1</sup> Concentrations of compounds in the reaction used in the first screening were shown as  $\mu\text{M}$ .
