# Supplementary material for: Conferring High IAA Productivity on Low-IAA-Producing Organisms with PonAAS2, an Aromatic Aldehyde Synthase of a Galling Sawfly, and Identification of Its Inhibitor
Source: MDPI journal article supplement (doi:10.3390/insects14070598), 2023-07-02
Supplement: s1 [file s1]

Table S1. Sequences of promoters used in this study.

|               |                                                                            |
|---------------|----------------------------------------------------------------------------|
| GFP_fw        | 5'-CCGGATCCATGAGTAAAGGAGAAGAACT ( <i>Bam</i> HI)                           |
| GFP_rv        | 5'-GTCGACAACACGCGTTCATTTGTATAGTTCGTCCATGC ( <i>Sal</i> I, <i>Mlu</i> I)    |
| unc-54-ter_fw | 5'-ACGCGTGTCCAATTACTCTTCAACATC ( <i>Mlu</i> I)                             |
| unc-54-ter_rv | 5'-GTCGACAACGGCCACGGTGGCCAAACAGTTATGTTTGGTA ( <i>Sal</i> I, <i>Sfi</i> I)  |
| cdc-42-pro_fw | 5'-CCGGTACCCGATTCTAGAGGAGGTCGTCG ( <i>Kpn</i> I)                           |
| cdc-42-pro_rv | 5'-CCGGATCCCAACCCCTAGGTTTCGCCTGAAAAAAAAAATG ( <i>Bam</i> HI, <i>Bln</i> I) |
