# Supplementary figures and images for: Conferring High IAA Productivity on Low-IAA-Producing Organisms with PonAAS2, an Aromatic Aldehyde Synthase of a Galling Sawfly, and Identification of Its Inhibitor
Source: MDPI journal article supplement (doi:10.3390/insects14070598), 2023-07-02

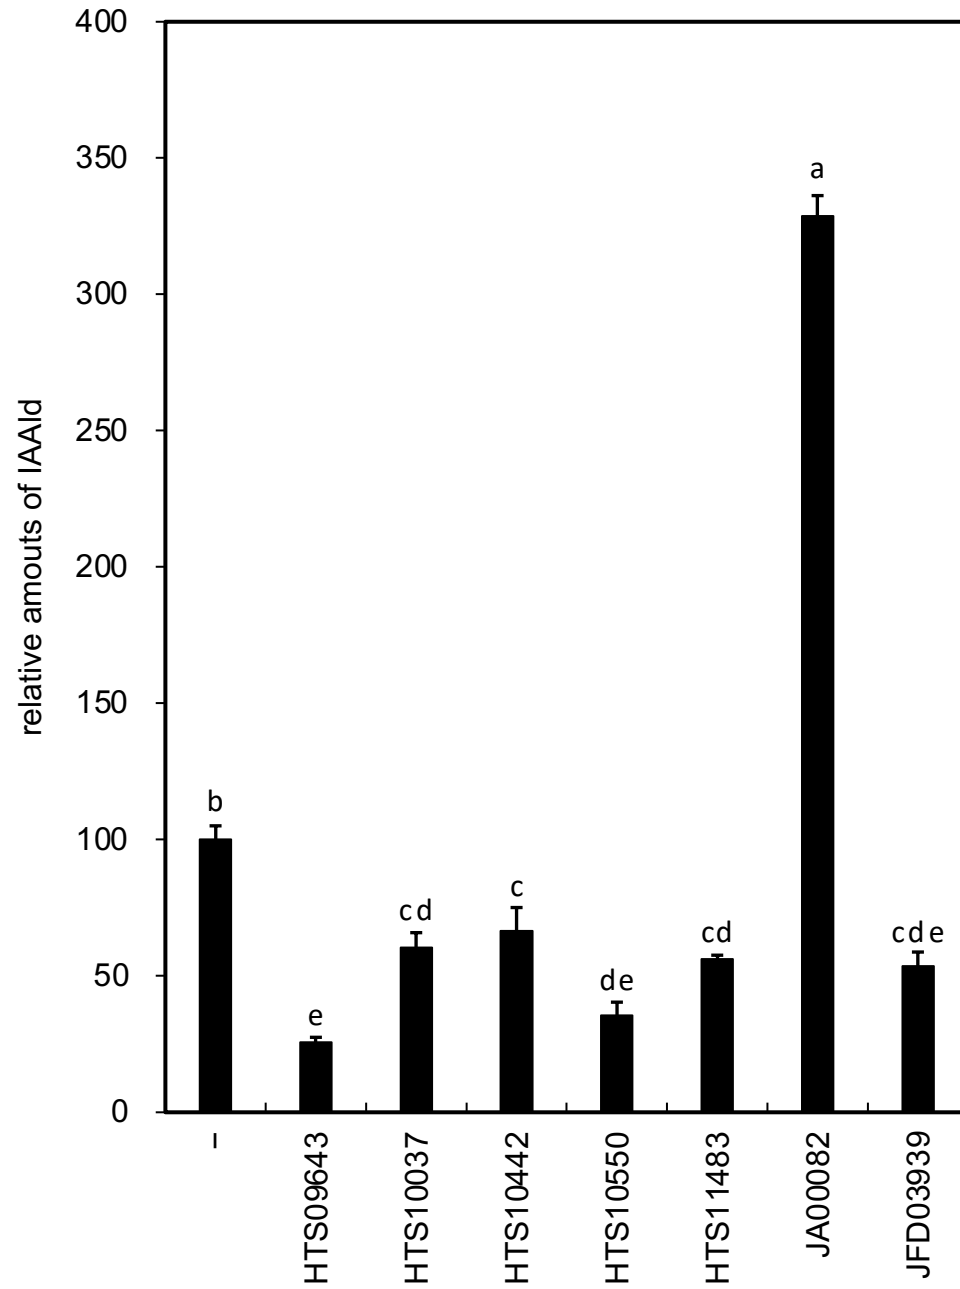

Supplement: s1 [file s1]

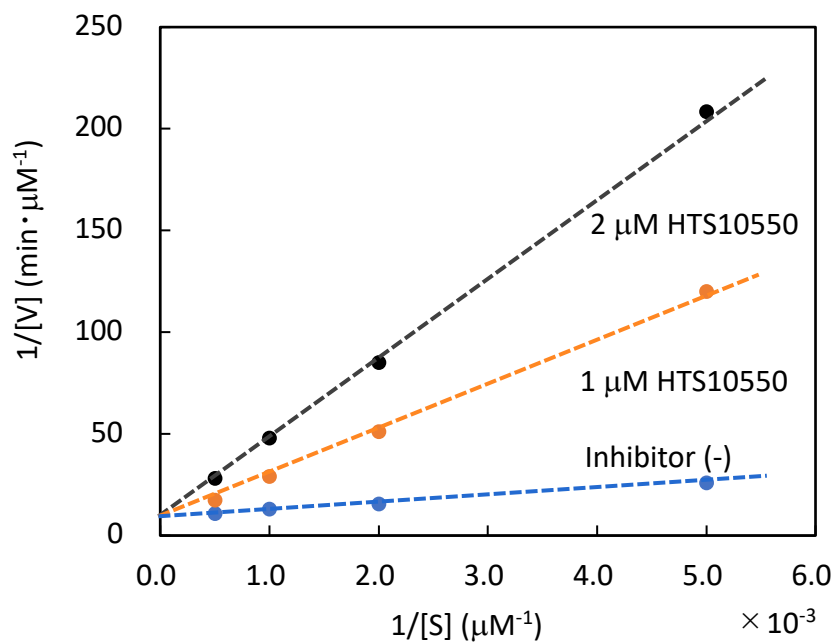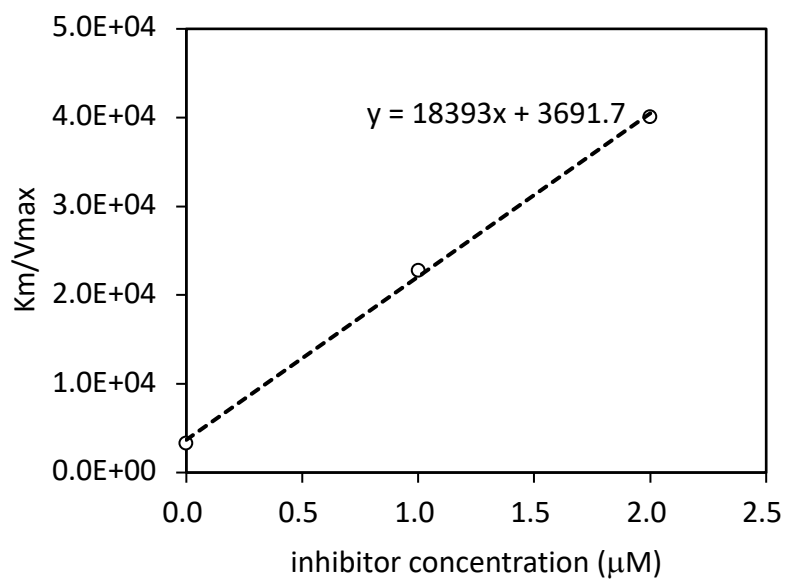

Supplement: s1 [file s1]
